# Supplementary material
Source: MDPI journal article supplement (https://www.mdpi.com/2304-6767/11/7/171)
Supplement: s1 [file s1]

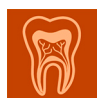

## **Supplementary Material S1:**

### **DETAILED SEARCH STRATEGY**

#### **PUBMED:**

("aggressive periodontitis"[MeSH Terms] OR "aggressive periodontitis"[All Fields] OR "juvenile periodontitis"[All Fields] OR "pre-pubertal periodontitis"[All Fields] OR "rapidly progressing periodontitis"[All Fields] OR "early onset periodontitis"[All Fields]) AND ("tooth, deciduous"[MeSH Terms] OR "deciduous tooth"[All Fields] OR "primary teeth"[All Fields] OR "primary tooth"[All Fields] OR "deciduous teeth"[All Fields] OR "primary dentition"[All Fields] OR "deciduous dentition"[All Fields] OR "mixed dentition"[All Fields] OR "child"[MeSH Terms] OR "child"[All Fields] OR "children"[All Fields])

#### **WEB OF SCIENCE:**

1. ALL=(aggressive periodontitis OR juvenile periodontitis OR pre-pubertal periodontitis OR pre pubertal periodontitis OR rapidly progressing periodontitis OR early onset periodontitis)

2. ALL=(deciduous tooth OR primary teeth OR primary tooth OR deciduous teeth OR primary dentition OR deciduous dentition OR mixed dentition OR child OR children)

Final search: 1 AND 2

#### **EMBASE:**

1. 'aggressive periodontitis'/exp OR 'aggressive periodontitis' OR 'aggressive periodontitis':ti,ab,kw,de OR 'juvenile periodontitis':ti,ab,kw,de OR 'pre pubertal periodontitis':ti,ab,kw,de OR 'pre-pubertal periodontitis':ti,ab,kw,de OR 'rapidly progressing periodontitis':ti,ab,kw,de OR 'early onset periodontitis':ti,ab,kw,de

2. 'deciduous tooth'/exp OR 'deciduous tooth' OR 'deciduous tooth':ti,ab,kw,de OR 'primary teeth':ti,ab,kw,de OR 'primary tooth':ti,ab,kw,de OR 'deciduous teeth':ti,ab,kw,de OR 'primary dentition':ti,ab,kw,de OR 'deciduous dentition':ti,ab,kw,de OR 'mixed dentition'/exp OR 'mixed dentition' OR 'mixed dentition':ti,ab,kw,de OR 'child'/exp OR 'child' OR 'child':ti,ab,kw,de OR 'children':ti,ab,kw,de

Final Search: #1 AND #2

#### **EBSCOHST:**

S1: (MH "Aggressive Periodontitis+")

S2: aggressive periodontitis OR juvenile periodontitis OR pre pubertal periodontitis OR pre-pubertal periodontitis OR rapidly progressing periodontitis OR early onset periodontitis

S3: (MH "Tooth, Deciduous+") OR (MH "Dentition, Primary+")

S4: (MH "Child+")

S5: deciduous tooth OR primary teeth OR primary tooth OR deciduous teeth OR primary dentition OR deciduous dentition OR mixed dentition OR child OR children

Final search: ( S1 OR S2 ) AND ( S3 OR S4 OR S5 )

## EXCLUDED ARTICLES

| S. No | AUTHOR NAME                   | YEAR | REASON FOR EXCLUSION                                    |
|-------|-------------------------------|------|---------------------------------------------------------|
| 1     | Abbott [48]                   | 1989 | Unable to obtain full text of paper                     |
| 2     | Allin et al. [49]             | 2016 | Outcomes for primary teeth not reported <sup>s</sup>    |
| 3     | Barber et al. [50]            | 2012 | Treatment outcomes not reported                         |
| 4     | Beliveau et al. [51]          | 2012 | Permanent teeth                                         |
| 5     | Bimstein et al. [25]          | 1997 | Same patient population as in another paper             |
| 6     | Bimstein [52]                 | 2004 | Review article                                          |
| 7     | Bimstein et al. [12]          | 2004 | Patient with immune deficiency                          |
| 8     | Bodur et al. [53]             | 2001 | Permanent teeth                                         |
| 9     | Branco-de-Almeida et al. [34] | 2021 | Outcomes for primary teeth not reported <sup>s</sup>    |
| 10    | Budtz Jorgensen et al. [54]   | 1977 | Unable to obtain full text of paper                     |
| 11    | Buduneli et al. [55]          | 2001 | Treatment outcomes not reported                         |
| 12    | Burgess et al. [56]           | 2017 | Outcomes for primary teeth not reported <sup>s</sup>    |
| 13    | Butler [57]                   | 1969 | Permanent teeth                                         |
| 14    | Celenligil et al. [58]        | 1987 | Permanent teeth                                         |
| 15    | Christersson et al. [59]      | 1985 | Permanent teeth                                         |
| 16    | Christersson et al. [60]      | 1993 | Review article                                          |
| 17    | Cogen et al. [61]             | 1984 | Treatment outcomes not reported                         |
| 18    | Compton et al. [62]           | 1983 | Unable to obtain full text of paper                     |
| 19    | Debevc and Silver [63]        | 2011 | Review article                                          |
| 20    | Dibart et al. [64]            | 1998 | Treatment outcomes not reported                         |
| 21    | Dopico et al. [65]            | 2016 | Permanent teeth                                         |
| 22    | Dosumu et al. [66]            | 2015 | Permanent teeth                                         |
| 23    | Emingil et al. [67]           | 2001 | Permanent teeth                                         |
| 24    | Epstein [68]                  | 1995 | Permanent teeth                                         |
| 25    | Fretwell et al. [69]          | 1981 | Treatment outcomes not reported                         |
| 26    | Goepferd [70]                 | 1981 | Treatment outcomes not reported                         |
| 27    | Gonçalves et al. [71]         | 2013 | Outcomes for primary teeth not reported <sup>s</sup>    |
| 28    | Haring [72]                   | 1999 | Treatment outcomes not reported                         |
| 29    | Hempton et al. [73]           | 1997 | Review article                                          |
| 30    | Hoffman [74]                  | 1983 | Permanent teeth                                         |
| 31    | Kalash et al. [75]            | 2015 | Outcomes for primary teeth not reported <sup>s</sup>    |
| 32    | Katz et al. [76]              | 1989 | Treatment outcomes not reported                         |
| 33    | Kornman and Robertson [77]    | 1985 | Permanent teeth                                         |
| 34    | Kunihira et al. [78]          | 1985 | Permanent teeth                                         |
| 35    | Linden et al. [79]            | 1994 | Patient did not follow through with specified treatment |
| 36    | Liyange et al. [80]           | 2016 | Immune deficiency                                       |
| 37    | Lopez [81]                    | 1992 | Permanent teeth                                         |

|    |                           |      |                                                      |
|----|---------------------------|------|------------------------------------------------------|
| 38 | Mandell et al. [82]       | 1986 | Follow-up clinical outcomes not reported             |
| 39 | Mandell et al. [83]       | 1986 | Permanent teeth                                      |
| 40 | McIntyre [84]             | 1989 | Review article                                       |
| 41 | McLain et al. [85]        | 1983 | Permanent teeth                                      |
| 42 | Mengel et al. [86]        | 2002 | Permanent teeth                                      |
| 43 | Michel et al. [87]        | 1993 | Outcomes of interest not reported                    |
| 44 | Mishkin et al. [88]       | 1986 | Treatment outcomes not reported                      |
| 45 | Modin et al. [89]         | 2017 | Permanent teeth                                      |
| 46 | Mombelli et al. [90]      | 2013 | Permanent teeth                                      |
| 47 | Mombelli et al. [91]      | 2015 | Permanent teeth                                      |
| 48 | Monteiro et al. [92]      | 2020 | Patients did not have aggressive periodontitis       |
| 49 | Morimoto et al. [93]      | 2019 | Immune deficiency                                    |
| 50 | Muppa et al. [94]         | 2016 | Treatment outcomes not reported                      |
| 51 | Myers et al. [95]         | 1989 | Treatment outcomes not reported                      |
| 52 | Nowzari et al. [96]       | 2001 | No details of treatment                              |
| 53 | Ogunsalu et al. [97]      | 2011 | No details of treatment                              |
| 54 | Olgun-Erdemir et al. [98] | 2010 | Treatment outcomes not reported                      |
| 55 | Page et al. [99]          | 1985 | Permanent teeth                                      |
| 56 | Palmer et al. [100]       | 1996 | Permanent teeth                                      |
| 57 | Piergallini et al. [101]  | 2014 | Language other than English                          |
| 58 | Prud'homme et al. [102]   | 2018 | Treatment outcomes not reported                      |
| 59 | Qi et al. [103]           | 2021 | Outcomes of interest not reported                    |
| 60 | Ram and Bimstein [104]    | 1994 | Treatment outcomes not reported                      |
| 61 | Ramich et al. [105]       | 2018 | Permanent teeth                                      |
| 62 | Reis et al. [106]         | 2021 | Permanent teeth                                      |
| 63 | Rosenthal [107]           | 1951 | Outcomes of interest not reported                    |
| 64 | Shaddox et al. [108]      | 2013 | Outcomes for primary teeth not reported <sup>§</sup> |
| 65 | Shapira et al. [109]      | 1994 | Permanent teeth                                      |
| 66 | Sharma and Whatling [42]  | 2011 | Treatment outcomes not reported                      |
| 67 | Sood et al. [110]         | 1988 | Treatment outcomes not reported                      |
| 68 | Spektor et al. [111]      | 1985 | No treatment discussed                               |
| 69 | Steiger et al. [112]      | 2008 | Outcomes of interest not reported                    |
| 70 | Suzuki et al. [113]       | 1985 | Permanent teeth                                      |
| 71 | Tavakoli et al. [114]     | 2022 | Outcomes for primary teeth not reported <sup>§</sup> |
| 72 | Tinoco et al. [115]       | 1998 | Permanent teeth                                      |
| 73 | Vandana and Redy [116]    | 2003 | Treatment outcomes not reported                      |
| 74 | Velsko et al. [36]        | 2020 | Outcomes for primary teeth not reported <sup>§</sup> |
| 75 | Watanabe [117]            | 1991 | Permanent teeth                                      |
| 76 | Yalcin et al. [118]       | 2001 | Permanent teeth                                      |

Articles that were excluded after full-text screening, along with the reason for exclusion.

§ - Authors were contacted to request additional data from the study, to determine possible inclusion.

## PRISMA CHECKLIST

| Section and Topic       | Item # | Checklist item                                                                                                                                                                                                                                                                                       | Location where item is reported |
|-------------------------|--------|------------------------------------------------------------------------------------------------------------------------------------------------------------------------------------------------------------------------------------------------------------------------------------------------------|---------------------------------|
| <b>TITLE</b>            |        |                                                                                                                                                                                                                                                                                                      |                                 |
| Title                   | 1      | Identify the report as a systematic review.                                                                                                                                                                                                                                                          | 1                               |
| <b>ABSTRACT</b>         |        |                                                                                                                                                                                                                                                                                                      |                                 |
| Abstract                | 2      | See the PRISMA 2020 for Abstracts checklist.                                                                                                                                                                                                                                                         | 1                               |
| <b>INTRODUCTION</b>     |        |                                                                                                                                                                                                                                                                                                      |                                 |
| Rationale               | 3      | Describe the rationale for the review in the context of existing knowledge.                                                                                                                                                                                                                          | 2                               |
| Objectives              | 4      | Provide an explicit statement of the objective(s) or question(s) the review addresses.                                                                                                                                                                                                               | 2                               |
| <b>METHODS</b>          |        |                                                                                                                                                                                                                                                                                                      |                                 |
| Eligibility criteria    | 5      | Specify the inclusion and exclusion criteria for the review and how studies were grouped for the syntheses.                                                                                                                                                                                          | 2,3                             |
| Information sources     | 6      | Specify all databases, registers, websites, organisations, reference lists and other sources searched or consulted to identify studies. Specify the date when each source was last searched or consulted.                                                                                            | 3                               |
| Search strategy         | 7      | Present the full search strategies for all databases, registers and websites, including any filters and limits used.                                                                                                                                                                                 | Supplement 1                    |
| Selection process       | 8      | Specify the methods used to decide whether a study met the inclusion criteria of the review, including how many reviewers screened each record and each report retrieved, whether they worked independently, and if applicable, details of automation tools used in the process.                     | 3                               |
| Data collection process | 9      | Specify the methods used to collect data from reports, including how many reviewers collected data from each report, whether they worked independently, any processes for obtaining or confirming data from study investigators, and if applicable, details of automation tools used in the process. | 3,4                             |
| Data items              | 10a    | List and define all outcomes for which data were sought. Specify whether all results that were compatible with each outcome domain in each study were sought (e.g. for all measures, time points, analyses), and if not, the methods used to decide which results to collect.                        | 3,4                             |
|                         | 10b    | List and define all other variables for which data were sought (e.g. participant and intervention characteristics, funding sources). Describe any                                                                                                                                                    | 3,4                             |

| Section and Topic             | Item # | Checklist item                                                                                                                                                                                                                                                    | Location where item is reported |
|-------------------------------|--------|-------------------------------------------------------------------------------------------------------------------------------------------------------------------------------------------------------------------------------------------------------------------|---------------------------------|
|                               |        | assumptions made about any missing or unclear information.                                                                                                                                                                                                        |                                 |
| Study risk of bias assessment | 11     | Specify the methods used to assess risk of bias in the included studies, including details of the tool(s) used, how many reviewers assessed each study and whether they worked independently, and if applicable, details of automation tools used in the process. | 4                               |
| Effect measures               | 12     | Specify for each outcome the effect measure(s) (e.g. risk ratio, mean difference) used in the synthesis or presentation of results.                                                                                                                               | 4                               |
| Synthesis methods             | 13a    | Describe the processes used to decide which studies were eligible for each synthesis (e.g. tabulating the study intervention characteristics and comparing against the planned groups for each synthesis (item #5)).                                              | 4                               |
|                               | 13b    | Describe any methods required to prepare the data for presentation or synthesis, such as handling of missing summary statistics, or data conversions.                                                                                                             | 4                               |
|                               | 13c    | Describe any methods used to tabulate or visually display results of individual studies and syntheses.                                                                                                                                                            | 4                               |
|                               | 13d    | Describe any methods used to synthesize results and provide a rationale for the choice(s). If meta-analysis was performed, describe the model(s), method(s) to identify the presence and extent of statistical heterogeneity, and software package(s) used.       | 4                               |
|                               | 13e    | Describe any methods used to explore possible causes of heterogeneity among study results (e.g. subgroup analysis, meta-regression).                                                                                                                              | N/A                             |
|                               | 13f    | Describe any sensitivity analyses conducted to assess robustness of the synthesized results.                                                                                                                                                                      | N/A                             |
| Reporting bias assessment     | 14     | Describe any methods used to assess risk of bias due to missing results in a synthesis (arising from reporting biases).                                                                                                                                           | N/A                             |
| Certainty assessment          | 15     | Describe any methods used to assess certainty (or confidence) in the body of evidence for an outcome.                                                                                                                                                             | N/A                             |
| <b>RESULTS</b>                |        |                                                                                                                                                                                                                                                                   |                                 |
| Study selection               | 16a    | Describe the results of the search and selection process, from the number of records identified in the search to the number of studies included in the review, ideally using a flow diagram.                                                                      | 4,5, Figure1                    |
|                               | 16b    | Cite studies that might appear to meet the inclusion criteria, but which were excluded, and explain why they were excluded.                                                                                                                                       | Supplement 1                    |
| Study characteristics         | 17     | Cite each included study and present its characteristics.                                                                                                                                                                                                         | 6-10                            |

| Section and Topic             | Item # | Checklist item                                                                                                                                                                                                                                                                       | Location where item is reported |
|-------------------------------|--------|--------------------------------------------------------------------------------------------------------------------------------------------------------------------------------------------------------------------------------------------------------------------------------------|---------------------------------|
| Risk of bias in studies       | 18     | Present assessments of risk of bias for each included study.                                                                                                                                                                                                                         | 10-12                           |
| Results of individual studies | 19     | For all outcomes, present, for each study: (a) summary statistics for each group (where appropriate) and (b) an effect <u>estimate</u> and its precision (e.g. confidence/credible interval), ideally using structured tables or plots.                                              | 6-10                            |
| Results of syntheses          | 20a    | For each synthesis, briefly summarise the characteristics and risk of bias among contributing studies.                                                                                                                                                                               | 10-12                           |
|                               | 20b    | Present results of all statistical syntheses conducted. If meta-analysis was done, present for each the summary estimate and its precision (e.g. confidence/credible interval) and measures of statistical heterogeneity. If comparing groups, describe the direction of the effect. | N/A                             |
|                               | 20c    | Present results of all investigations of possible causes of heterogeneity among study results.                                                                                                                                                                                       | N/A                             |
|                               | 20d    | Present results of all sensitivity analyses conducted to assess the robustness of the synthesized results.                                                                                                                                                                           | N/A                             |
| Reporting biases              | 21     | Present assessments of risk of bias due to missing results (arising from reporting biases) for each synthesis assessed.                                                                                                                                                              | N/A                             |
| Certainty of evidence         | 22     | Present assessments of certainty (or confidence) in the body of evidence for each outcome assessed.                                                                                                                                                                                  | N/A                             |
| <b>DISCUSSION</b>             |        |                                                                                                                                                                                                                                                                                      |                                 |
| Discussion                    | 23a    | Provide a general interpretation of the results in the context of other evidence.                                                                                                                                                                                                    | 12,13                           |
|                               | 23b    | Discuss any limitations of the evidence included in the review.                                                                                                                                                                                                                      | 13                              |
|                               | 23c    | Discuss any limitations of the review processes used.                                                                                                                                                                                                                                | 13                              |
|                               | 23d    | Discuss implications of the results for practice, policy, and future research.                                                                                                                                                                                                       | 13,14                           |
| <b>OTHER INFORMATION</b>      |        |                                                                                                                                                                                                                                                                                      |                                 |
| Registration and protocol     | 24a    | Provide registration information for the review, including register name and registration number, or state that the review was not registered.                                                                                                                                       | 2                               |
|                               | 24b    | Indicate where the review protocol can be accessed, or state that a protocol was not prepared.                                                                                                                                                                                       | 2                               |
|                               | 24c    | Describe and explain any amendments to information provided at registration or in the protocol.                                                                                                                                                                                      | N/A                             |
| Support                       | 25     | Describe sources of financial or non-financial support for the review, and the role of the funders or sponsors in the review.                                                                                                                                                        | 14                              |



| Section and Topic                              | Item # | Checklist item                                                                                                                                                                                                                             | Location where item is reported |
|------------------------------------------------|--------|--------------------------------------------------------------------------------------------------------------------------------------------------------------------------------------------------------------------------------------------|---------------------------------|
| Competing interests                            | 26     | Declare any competing interests of review authors.                                                                                                                                                                                         | 14                              |
| Availability of data, code and other materials | 27     | Report which of the following are publicly available and where they can be found: template data collection forms; data extracted from included studies; data used for all analyses; analytic code; any other materials used in the review. | N/A                             |

## REFERENCES:

12. Bimstein, E.; McIlwain, M.; Katz, J.; Jerrell, G.; Primosch, R. Aggressive Periodontitis of the Primary Dentition Associated with Idiopathic Immune Deficiency: Case Report and Treatment Considerations. *J. Clin. Pediatr. Dent.* **2004**, *29*, 27–31.
25. Bimstein, E.; Sela, M.N.; Shapira, L. Clinical and Microbial Considerations for the Treatment of an Extended Kindred with Seven Cases of Prepubertal Periodontitis: A 2-Year Follow-Up. *Pediatr. Dent.* **1997**, *19*, 396–403.
34. Branco-de-Almeida, L.S.; Cruz-Almeida, Y.; Gonzalez-Marrero, Y.; Kudsi, R.; de Oliveira, I.C.V.; Dolia, B.; Huang, H.; Aukhil, I.; Harrison, P.; Shaddox, L.M. Treatment of Localized Aggressive Periodontitis Alters Local Host Immunoinflammatory Profiles: A Long-Term Evaluation. *J. Clin. Periodontol.* **2021**, *48*, 237–248. <https://doi.org/10.1111/jcpe.13404>.
36. Velsko, I.M.; Harrison, P.; Chalmers, N.; Barb, J.; Huang, H.; Aukhil, I.; Shaddox, L. Grade C Molar-Incisor Pattern Periodontitis Subgingival Microbial Profile before and after Treatment. *J. Oral Microbiol.* **2020**, *12*, 1814674. <https://doi.org/10.1080/20002297.2020.1814674>.
42. Sharma, G.; Whatling, R. Case Report: Premature Exfoliation of Primary Teeth in a 4-Year-Old Child, a Diagnostic Dilemma. *Eur. Arch. Paediatr. Dent.* **2011**, *12*, 312–317. <https://doi.org/10.1007/BF03262830>.
48. Abbott, B. Periodontal disease in children and adolescents. *J. Macomb. Dent. Soc.* **1989**, *26*, 29.
49. Allin, N.; Cruz-Almeida, Y.; Velsko, I.; Vovk, A.; Hovemcamp, N.; Harrison, P.; Huang, H.; Aukhil, I.; Wallet, S.; Shaddox, L. Inflammatory Response Influences Treatment of Localized Aggressive Periodontitis.. *J. Dent. Res.* **2016**, *95*, 635–641. <https://doi.org/10.1177/0022034516631973>.
50. Barber, S.; Day, P.; Judge, M.; Toole, E.O.; Fayle, S. Variant Carvajal syndrome with additional dental anomalies. *Int. J. Paediatr. Dent.* **2012**, *22*, 390–396. <https://doi.org/10.1111/j.1365-263x.2012.01230.x>.
51. Beliveau, D.; Magnusson, I.; Bidwell, J.A.; Zapert, E.F.; Aukhil, I.; Wallet, S.M.; Shaddox, L.M. Benefits of early systemic antibiotics in localized aggressive periodontitis: A retrospective study. *J. Clin. Periodontol.* **2012**, *39*, 1075–1081. <https://doi.org/10.1111/jcpe.12001>.
52. Bimstein, E. Periodontal Health and Disease in Children and Adolescents. *Pediatr. Clin. North Am.* **1991**, *38*, 1183–1207. [https://doi.org/10.1016/s0031-3955\(16\)38194-9](https://doi.org/10.1016/s0031-3955(16)38194-9).
53. Bodur, A.; Bodur, H.; Bal, B.; Balos, K. Generalized aggressive periodontitis in a prepubertal patient: A case report. *Quin-Tessence Int.* **2001**, *32*, 303–308.
54. Budtz Jorgensen, E.; Ellegaard, J.; Ellegaard, B. CMI in juvenile periodontitis and the effect of levamisole treatment. *Allergol. Immunopathol.* **1977**, *5*, 314–315.
55. Buduneli, N.; Baylas, H.; Aksu, G.; Kütükçüler, N. Prepubertal periodontitis associated with chronic granulomatous disease. *J. Clin. Periodontol.* **2001**, *28*, 589–593. <https://doi.org/10.1034/j.1600-051x.2001.028006589.x>.

56. Burgess, D.K.; Huang, H.; Harrison, P.; Kompotiati, T.; Aukhil, I.; Shaddox, L.M. Non-Surgical Therapy Reduces Presence of JP2 Clone in Localized Aggressive Periodontitis. *J. Periodontol.* **2017**, *88*, 1263–1270. <https://doi.org/10.1902/jop.2017.170285>.
57. Butler, J.H. A Familial Pattern of Juvenile Periodontitis (Periodontosis). *J. Periodontol.* **1969**, *40*, 115–118. <https://doi.org/10.1902/jop.1969.40.2.115>.
58. Celenligil, H.; Kansu, E.; Eratalay, K.; Yavuzylmaz, E. Prepubertal periodontitis. A case report with an analysis of lymphocyte populations. *J. Clin. Periodontol.* **1987**, *14*, 85–88. <https://doi.org/10.1111/j.1600-051x.1987.tb00947.x>.
59. Christersson, L.A.; Slots, J.; Rosling, B.G.; Genco, R.J. Microbiological and clinical effects of surgical treatment of localized juvenile periodontitis. *J. Clin. Periodontol.* **1985**, *12*, 465–476. <https://doi.org/10.1111/j.1600-051x.1985.tb01382.x>.
60. Christersson, L.A. Actinobacillus actinomycetemcomitans and localized juvenile periodontitis. Clinical, microbiologic and histologic studies. *Swed. Dent. J. Suppl.* **1993**, *90*, 1–46.
61. Caufield, P.W.; Stanley, D.H.; Donaldson, D.K. Periodontal disease in healthy children: Two clinical reports. *Pediatr. Dent.* **1984**, *6*, 41–45.
62. Compton, D.W.; Claiborne, W.J.; Hutchens, L.H. Combined periodontal, orthodontic and fixed prosthetic treatment of juvenile periodontitis: A case report.. *Int. J. Periodontics Restor. Dent.* **1983**, *3*, 20–33.
63. Debevc, T.M.; Silver, J.G. Periodontal diseases affecting children and young adults. *J. Can. Dent. Assoc.* **1996**, *62*, 650–652.
64. Dibart, S.; Chapple, I.L.; Skobe, Z.; Shusterman, S.; Nedleman, H.L. Microbiological findings in prepubertal periodontitis. A case report. *J. Periodontol.* **1998**, *69*, 1172–1175. <https://doi.org/10.1902/jop.1998.69.10.1172>.
65. Dopico, J.; Nibali, L.; Donos, N. Disease progression in aggressive periodontitis patients. A Retrospective Study. *J. Clin. Periodontol.* **2016**, *43*, 531–537. <https://doi.org/10.1111/jcpe.12533>.
66. Dosumu, E.B.; Bankole, O.O.; Dosumu, O.O. Simultaneous occurrence of periodontal and skin abscesses in a Nigerian girl: Case report. *Afr. J. Biomed. Res.* **2015**, *18*, 249–255.
67. Emingil, G.; Darcan, .; Keskinoglu, A.; Kutukcüler, N.; Atilla, G. Localized aggressive periodontitis in a patient with type 1 diabetes mellitus: A case report. *J. Periodontol.* **2001**, *72*, 1265–1270. <https://doi.org/10.1902/jop.2000.72.9.1265>.
68. Epstein, S.R. Localized prepubertal periodontitis--nonsurgical treatment of an adolescent patient: A case report. *Pract. Periodontics Aesthet. Dent.* **1995**, *7*, 55–59.
69. Fretwell, L.D.; Leinbach, T.E.; Wiley, D.O. Juvenile periodontitis: Report of cases. *J. Am. Dent. Assoc.* **1982**, *105*, 1022–1025. <https://doi.org/10.14219/jada.archive.1982.0376>.
70. Goepferd, S.J. Advanced alveolar bone loss in the primary dentition: A case report. *J. Periodontol.* **1981**, *52*, 753–757. <https://doi.org/10.1902/jop.1981.52.12.753>.
71. Gonçalves, P.F.; Huang, H.; McAninley, S.; Alfant, B.; Harrison, P.; Aukhil, I.; Walker, C.; Shaddox, L.M. Periodontal treatment reduces matrix metalloproteinase levels in localized aggressive periodontitis. *J. Periodontol.* **2013**, *84*, 1801–1808. <https://doi.org/10.1902/jop.2013.130002>.
72. Haring, J.I. Case study. Early-onset periodontitis. *RDH* **1999**, *19*, 11–102.
73. Hempton, T.J.; Wilkins, E.; Lancaster, D. Localized juvenile periodontitis. *RDH* **1997**, *17*, 30–32.
74. Hoffman, I.D. Familial occurrence of juvenile periodontitis with varied treatment of one of the siblings with five-year follow-up: Case reports. *J. Periodontol.* **1983**, *54*, 44–49. <https://doi.org/10.1902/jop.1983.54.1.44>.
75. Kalash, D.; Vovk, A.; Huang, H.; Aukhil, I.; Wallet, S.M.; Shaddox, L.M. Influence of Periodontal Therapy on Systemic Lipopolysaccharides in Children with Localized Aggressive Periodontitis. *Pediatr. Dent.* **2015**, *37*, 35–40.

76. Katz, J.; Ben-Yehuda, A.; Machtei, E.E.; Danon, Y.L.; Metzker, A. Tumoral calcinosis associated with early onset periodontitis. *J. Clin. Periodontol.* **1989**, *16*, 643–646. <https://doi.org/10.1111/j.1600-051x.1989.tb01033.x>.
77. Kornman, K.S.; Robertson, P.B. Clinical and microbiological evaluation of therapy for juvenile periodontitis. *J. Periodontol.* **1985**, *56*, 443–446. <https://doi.org/10.1902/jop.1985.56.8.443>.
78. Kunihiro, D.M.; Caine, F.A.; Palcanis, K.G.; Best, A.M.; Ranney, R.R. A clinical trial of phenoxymethyl penicillin for adjunctive treatment of juvenile periodontitis. *J. Periodontol.* **1985**, *56*, 352–358. <https://doi.org/10.1902/jop.1985.56.6.352>.
79. Linden, G.; Fleming, P.; Coulter, W.; Lynn, G. Localized prepubertal periodontitis in a 5-year-old child: Investigations and clinical observations over a 3-year period. *Int. J. Paediatr. Dent.* **2009**, *4*, 47–53. <https://doi.org/10.1111/j.1365-263x.1994.tb00101.x>.
80. Liyange, S.; Edgar, D.; Shields, M.D.; Linden, G.J. Gingival Inflammation and Aggressive Periodontitis in a Child with a Specific Antibody Deficiency. *Dent. Updat.* **2016**, *43*, 130–136. <https://doi.org/10.12968/denu.2016.43.2.130>.
81. López, N.J. Clinical, Laboratory, and Immunological studies of a family with a high prevalence of generalized prepubertal and juvenile periodontitis. *J. Periodontol.* **1992**, *63*, 457–468. <https://doi.org/10.1902/jop.1992.63.5.457>.
82. Mandell, R.L.; Siegal, M.D.; Umland, E. Localized juvenile periodontitis of the primary dentition. *ASDC J. Dent. Child* **1986**, *53*, 193–196.
83. Mandell, R.L.; Tripodi, L.S.; Savitt, E.; Goodson, J.M.; Socransky, S.S. The effect of treatment on *Actinobacillus actinomycetemcomitans* in localized juvenile periodontitis. *J. Periodontol.* **1986**, *57*, 94–99. <https://doi.org/10.1902/jop.1986.57.2.94>.
84. McIntyre, T.R. Treatment of juvenile periodontitis. *Ont. Dent.* **1989**, *66*, 16–17.
85. McLain, J.B.; Proffit, W.R.; Davenport, R.H. Adjunctive orthodontic therapy in the treatment of juvenile periodontitis: Report of a case and review of the literature. *Am. J. Orthod.* **1983**, *83*, 290–298. [https://doi.org/10.1016/0002-9416\(83\)90224-5](https://doi.org/10.1016/0002-9416(83)90224-5).
86. Mengel, R.; Lehmann, K.M.; Metke, W.; Wolf, J.; Flores-de-Jacoby, L. A telescopic crown concept for the restoration of partially edentulous patients with aggressive generalized periodontitis: Two case reports. *Int. J. Periodontics Restor. Dent.* **2002**, *22*, 129–137.
87. Michel, J.F.; Michel, M.G.; Nadan, J.; Nowzari, H. The street children of Manila are affected by early-in-life periodontal infection: Description of a treatment modality: Sea salt. *Refuat Hapeh Vehashinayim (1993)* **2013**, *30*, 6–13.
88. Mishkin, D.J.; Grant, N.C.; Bergeron, R.A.; Young, W.L. Prepubertal periodontitis: A recently defined clinical entity. *Pediatr. Dent.* **1986**, *8*, 235–238.
89. Modin, C.; Abadji, D.; Adler, L.; Jansson, L. Treatment compliance in patients with aggressive periodontitis—A retrospective case-control study. *Acta Odontol. Scand.* **2016**, *75*, 94–99. <https://doi.org/10.1080/00016357.2016.1259497>.
90. Mombelli, A.; Cionca, N.; Almaghlouth, A.; Décaillet, F.; Courvoisier, D.S.; Giannopoulou, C. Are There Specific Benefits of Amoxicillin Plus Metronidazole in *Aggregatibacter actinomycetemcomitans*-Associated Periodontitis? Double-Masked, Randomized Clinical Trial of Efficacy and Safety. *J. Periodontol.* **2013**, *84*, 715–724. <https://doi.org/10.1902/jop.2012.120281>.
91. Mombelli, A.; Almaghlouth, A.; Cionca, N.; Courvoisier, D.S.; Giannopoulou, C. Differential Benefits of Amoxicillin–Metronidazole in Different Phases of Periodontal Therapy in a Randomized Controlled Crossover Clinical Trial. *J. Periodontol.* **2015**, *86*, 367–375. <https://doi.org/10.1902/jop.2014.140478>.



92. Monteiro, M.F.; Tonelli, H.; Reis, A.A.; Casati, M.Z.; Silvério, K.G.; Junior, F.H.N.; Sallum, E.A.; Casarin, R.C.V. Triclosan toothpaste as an adjunct therapy to plaque control in children from periodontitis families: A crossover clinical trial. *Clin. Oral Investig.* **2020**, *24*, 1421–1430. <https://doi.org/10.1007/s00784-019-03121-6>.
93. Morimoto, S.; Hirano, K.; Tabata, K.; Asaumi, H.; Morikawa, Y.; Matsumi, Y.; Naka, S.; Matsumoto-Nakano, M. Case of autoimmune neutropenia with severe marginal periodontitis. *Pediatr. Dent. J.* **2019**, *29*, 138–145. <https://doi.org/10.1016/j.pdj.2019.06.002>.
94. Muppa, R.; Nallanchakrava, S.; Chinta, M.; Manthena, R.T. Nonsyndromic localized aggressive periodontitis of primary dentition: A rare case report. *Contemp. Clin. Dent.* **2016**, *7*, 262–264. <https://doi.org/10.4103/0976-237x.183062>.
95. Myers, D.R.; O'Dell, N.L.; Clark, J.W.; Cross, R.L. Localized prepubertal periodontitis: Literature review and report of case. *ASDC J. Dent. Child* **1989**, *56*, 107–111.
96. Nowzari, H.; Jorgensen, M.G.; Ta, T.T.; Contreras, A.; Slots, J. Aggressive periodontitis associated with Fanconi's anemia. A case report. *J. Periodontol.* **2001**, *72*, 1601–1606. <https://doi.org/10.1902/jop.2001.72.11.1601>.
97. Ogunsalu, C.; Daisley, H.; Akpaka, P.E. Prevalence and antimicrobial susceptibility pattern of pathogens isolated from patients with juvenile periodontitis in Jamaica: A prospective multi-centre study of 15 cases over a 15-year period. *West. Indian Med. J.* **2011**, *60*, 235–239.
98. Olgun-Erdemir, E.; Yildirim, M.S.; Karşıyaka, M. Generalized aggressive periodontitis in a child with 92, XYYY / 46,XY mosaicism: Report of a second case. *Turk. J. Pediatr.* **2010**, *52*, 94–96.
99. Page, R.C.; Vandestein, G.E.; Ebersole, J.L.; Williams, B.L.; Dixon, I.L.; Altman, L.C. Clinical and laboratory studies of a family with a high prevalence of juvenile periodontitis. *J. Periodontol.* **1985**, *56*, 602–610. <https://doi.org/10.1902/jop.1985.56.10.602>.
100. Palmer, R.; Watts, T.L.P.; Wilson, R. A double-blind trial of tetracycline in the management of early onset periodontitis. *J. Clin. Periodontol.* **1996**, *23*, 670–674. <https://doi.org/10.1111/j.1600-051x.1996.tb00592.x>.
101. Piergallini, G.; Malerba, A.; Mazzucchelli, L.; Strohmer, L. Generalized aggressive periodontitis in prepubertal age: Description and comparison of two cases. *Pediatr. Medica Chir.* **2014**, *36*, 95. <https://doi.org/10.4081/pmc.2014.95>.
102. Roy, E.; Soueidan, A.; Fouassier, M. Multidisciplinary Clinical Management of a Localized Aggressive Periodontitis diagnosed in a Child with Glanzmann's Thrombasthenia. *Int. J. Clin. Pediatr. Dent.* **2018**, *11*, 344–348. <https://doi.org/10.5005/jp-journals-10005-1536>.
103. Qi, G.; Yu, K.; Feng, Y.; Zhang, Y.; Shao, Q.; Yu, M.; Wang, Y.; Ren, L.; Zhu, D.; Yang, G.; et al. 1 $\alpha$ ,25-dihydroxyvitamin D3 promotes early osteogenic differentiation of PDLSCs and a 12-year follow-up case of early-onset vitamin D deficiency periodontitis. *J. Steroid Biochem. Mol. Biol.* **2021**, *208*, 105805. <https://doi.org/10.1016/j.jsbmb.2020.105805>.
104. Ram, D.; Bimstein, E. Subgingival bacteria in a case of prepubertal periodontitis, before and one year after extractions of the affected primary teeth. *J. Clin. Pediatr. Dent.* **1994**, *19*, 45–47.
105. Ramich, T.; Asendorf, A.; Nickles, K.; Oremek, G.M.; Schubert, R.; Nibali, L.; Wohlfeil, M.; Eickholz, P. Inflammatory serum markers up to 5 years after comprehensive periodontal therapy of aggressive and chronic periodontitis. *Clin. Oral Investig.* **2018**, *22*, 3079–3089. <https://doi.org/10.1007/s00784-018-2398-x>.
106. Reis, A.A.; Paz, H.E.D.S.; Monteiro, M.D.F.; Casati, M.Z.; Steiner-Oliveira, C.; Pascon, F.M.; Casarin, R.C.V. Early Manifestation of Periodontal Disease in Children and Its Association with Familial Aggregation. *J. Dent. Child.* **2021**, *88*, 140–143.
107. Rosenthal, S.L. Case Report: Periodontosis in a Child Resulting in Exfoliation of the Teeth. *J. Periodontol.* **1951**, *22*, 101–104. <https://doi.org/10.1902/jop.1951.22.2.101>.

108. Shaddox, L.; Gonçalves, P.; Vovk, A.; Allin, N.; Huang, H.; Hou, W.; Aukhil, I.; Wallet, S. LPS-induced inflammatory response after therapy of aggressive periodontitis. *J. Dent. Res.* **2013**, *92*, 702–708. <https://doi.org/10.1177/0022034513495242>.
109. Shapira, L.; Smidt, A.; Van Dyke, T.E.; Barak, V.; Soskolne, A.W.; Brautbar, C.; Sela, M.N.; Bimstein, E. Sequential manifestation of different forms of early-onset periodontitis. A case report. *J. Periodontol.* **1994**, *65*, 631–635. <https://doi.org/10.1902/jop.1994.65.6.631>.
110. Sood, P.B.; Sood, M.; Mescarenhas, A.K. Prepubertal periodontitis—a case report. *J. Indian Soc. Pedod. Prev. Dent.* **1988**, *6*, 45–47.
111. Spektor, M.D.; Vandesteen, G.E.; Page, R.C. Clinical studies of one family manifesting rapidly progressive, juvenile and prepubertal periodontitis. *J. Periodontol.* **1985**, *56*, 93–101. <https://doi.org/10.1902/jop.1985.56.2.93>.
112. Steiger, J.; Zeevi, A.; Bhola, M. Aggressive periodontitis: A case report. *J. Mich. Dent. Assoc.* **2008**, *90*, 40–46.
113. Suzuki, J.B.; Risom, L.; Falkler, W.A.; Collison, C.; Bowers, G. Effect of periodontal therapy on spontaneous lymphocyte response and neutrophil chemotaxis in localized and generalized juvenile periodontitis patients\*. *J. Clin. Periodontol.* **1985**, *12*, 124–134. <https://doi.org/10.1111/j.1600-051x.1985.tb01371.x>.
114. Tavakoli, T.T.; Gholami, F.; Huang, H.; Gonçalves, P.F.; Villasante-Tezanos, A.; Aukhil, I.; Oliveira, R.C.G.; Hovencamp, N.; Wallet, S.; Ioannidou, E.; et al. Gender differences in immunological response of African-American juveniles with Grade C molar incisor pattern periodontitis. *J. Periodontol.* **2021**, *93*, 392–402. <https://doi.org/10.1002/jper.21-0143>.
115. Tinoco, E.M.; Beldi, M.I.; Campedelli, F.; Lana, M.; Loureiro, C.A.; Bellini, H.T.; Rams, T.E.; Tinoco, N.M.; Gjermo, P.; Preus, H.R. Clinical and microbiological effects of adjunctive antibiotics in treatment of localized juvenile periodontitis. A controlled clinical trial. *J. Periodontol.* **1998**, *69*, 1355–1363. <https://doi.org/10.1902/jop.1998.69.12.1355>.
116. Vandana, K.L.; Redy, B.V.R. Prepubertal periodontitis: A report of 2 cases. *J. Dent. Child (Chic)* **2003**, *70*, 82–85.
117. Watanabe, K. Generalized juvenile periodontitis in a thirteen-year-old child. *ASDC J. Dent. Child* **1991**, *58*, 390–395.
118. Yalçın, S.; Yalçın, F.; Günay, Y.; Bellaz, B.; Önal, Ş.; Firatli, E. Treatment of aggressive periodontitis by osseointegrated dental implants. A case report. *J. Periodontol.* **2001**, *72*, 411–416. <https://doi.org/10.1902/jop.2001.72.3.411>.
